# Supplementary material for: Association between non-registration of chronic kidney disease and mortality and cardiovascular outcome: a time-to-event analysis of retrospective primary care data
Source: PubMed Central journal article supplement — BMJ Open. 2024 May 13;14(5):e081115. doi: 10.1136/bmjopen-2023-081115 (PMC11097823; doi:10.1136/bmjopen-2023-081115), 2024-05-13
Supplement: bmjopen-2023-081115supp001.pdf [file bmjopen-2023-081115supp001.pdf]

### **Supplemental file 1: ATC codes**

#### Antihypertensiva

- ACE inhibitors: C09A, C09B, or C10BX04, C10BX06, C10BX07, C10BX11, C10BX12, C10BX13, C10BX14, C10BX15, C10BX17, C10BX18 (combination)
- ARBs: C09C, C09D, or C10BX10, C10BX16 (combination)
- Angiotensin receptor-neprilysin inhibitor (ARNI): C09DX04
- Beta blockers: C07
- Calcium channel blockers: C08C, C08D, C08G, or C10BX03, C10BX07, C10BX09, C10BX11, C10BX14, C10BX18
- Alpha blockers, i.e., clonidine, moxonidine and methyl dopa: C02AC01, C02AC05, C02AB
- Thiazide diuretics: C03A, or C10BX13
- Aldosterone receptor agonists (MRA): C03DA
- Loop diuretics: C03C

#### Lipid lowering medication

- C10

#### Antidiabetic drugs

- Metformin: A10BA02, or A10BD02, A10BD03, A10BD05, A10BD07, A10BD08, A10BD10, A10BD11, A10BD13, A10BD14, A10BD15, A10BD16, A10BD17, A10BD18, A10BD20, A10BD22, A10BD23, A10BD25, A10BD26 (combination)
- Sulphonylurea: A10BB, or A10BD01, A10BD02, A10BD04, A10BD06 (combination)
- Dipeptidyl peptidase 4 inhibitors (DPP-4i): A10BH, or A10BD07, A10BD08, A10BD09, A10BD10, A10BD11, A10BD12, A10BD13 (combination)
- Glucagon-like peptide-1 receptor agonist (GLP1-RA): A10BJ
- Insulin: A10AB, A10AC, A10AD, A10AE
- SGLT2s: A10BK01, A10BK02, A10BK03, A10BK04 or A10BD15, A10BD16, A10BD19, A10BD20, A10BD21, A10BD23, A10BD24, A10BD25 (in combination)
- Other oral anti-diabetic (OADs); Pioglitazon, acarbose, repaglinide: A10BG03, A10BF01, A10BX02, or A10BD05, A10BD06, A10BD12, A10BD14, A10BD17 (combination)
