# Supplementary material for: Association between non-registration of chronic kidney disease and mortality and cardiovascular outcome: a time-to-event analysis of retrospective primary care data
Source: PubMed Central journal article supplement — BMJ Open. 2024 May 13;14(5):e081115. doi: 10.1136/bmjopen-2023-081115 (PMC11097823; doi:10.1136/bmjopen-2023-081115), 2024-05-13
Supplement: bmjopen-2023-081115supp002.pdf [file bmjopen-2023-081115supp002.pdf]

**Supplemental file 2: Missing variables**

| <b>Variable</b>   | <b>Missingness</b> |
|-------------------|--------------------|
| Total patients    | 10551              |
| Smoking           | 75.98%             |
| SBP               | 7.89%              |
| Total Cholesterol | 15.2%              |
| BMI               | 55.34%             |
