# Supplementary figures and images for: Association between non-registration of chronic kidney disease and mortality and cardiovascular outcome: a time-to-event analysis of retrospective primary care data
Source: PubMed Central journal article supplement — BMJ Open. 2024 May 13;14(5):e081115. doi: 10.1136/bmjopen-2023-081115 (PMC11097823; doi:10.1136/bmjopen-2023-081115), 2024-05-13

**Supplemental file 3: Flow chart of the study population**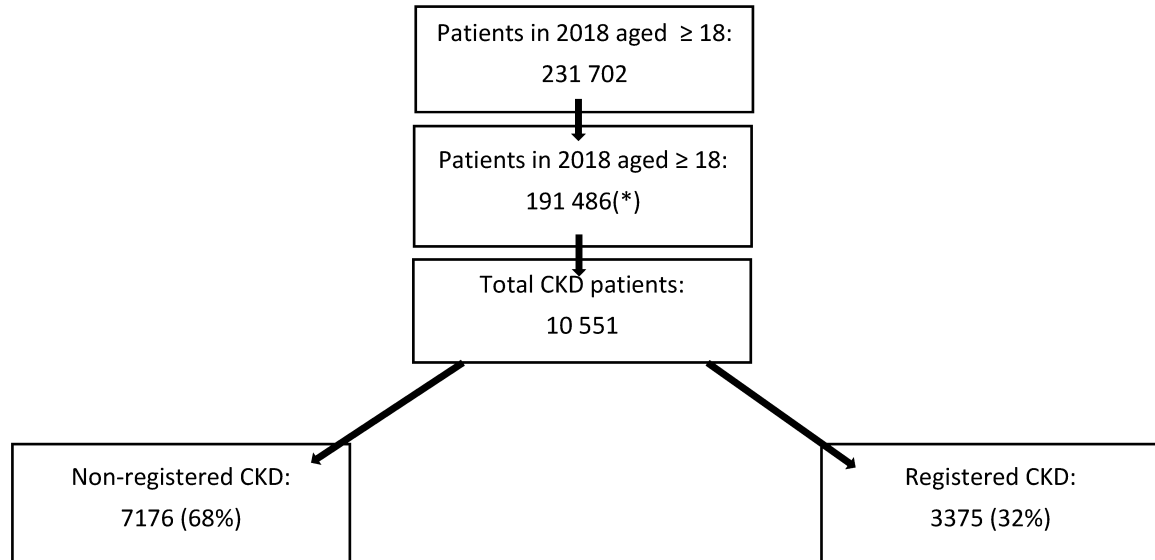

Supplement: bmjopen-2023-081115supp003.pdf [file bmjopen-2023-081115supp003.pdf]
